# Supplementary material
Source: publisher figshare collection journal article supplement (https://tandf.figshare.com/articles/dataset/_/9947720)
Supplement: Supplementary file 1 [file 1]

Archive with 3 entries (3 files):
- ijmf_a_1674803_sm8600.pdf
- ijmf_a_1674803_sm8599.xlsm
- ijmf_a_1674803_sm8597.docx
