# Supplementary material
Source: publisher figshare collection journal article supplement (https://tandf.figshare.com/articles/dataset/_/9947720)
Supplement: Supplementary file 1 [file 1 › ijmf_a_1674803_sm8597.docx]

Table S1 showing the different case scenario and the probability of success using from the calculator based on the equation derived from the study

| Variable | Case 1 | Case 2 | Case 3 |
| --- | --- | --- | --- |
| Parity | Nulliparous **(0)** | Multiparous **(3)** | Multiparous **(3)** |
| Placenta | Other **(0)** | Posterior **(1)** | Posterior **(1)** |
| Liquor (AFI) | **5 (0)** | 10 **(2)** | 10 **(2)** |
| Type of breech | Extended **(0)** | Footling **(1)** | Flexed **(2)** |
| Station | Engaged **(0)** | Not engaged **(2)** | Not engaged **(2)** |
| Position | Others **(0)** | Sacro anterior **(2)** | Sacro anterior **(2)** |
| Uterine Tone | Increased **(0)** | Normal **(1)** | Normal **(1)** |
| Score | 0 | 11 | 13 |
| Probability of successful version | 4% | 92(%) | 98% |
