# Supplementary material
Source: publisher figshare collection journal article supplement (https://tandf.figshare.com/articles/dataset/_/9947720)
Supplement: Supplementary file 1 [file 1 › ijmf_a_1674803_sm8599.xlsm]

## Sheet: Sheet1
1	Anitha	23	1	0	1	0	0	0	0	22
2	sharmi	23	0	1	1	1	1	0	0	58
