# Supplementary material
Source: publisher figshare collection journal article supplement (https://tandf.figshare.com/articles/dataset/_/9947720)
Supplement: Supplementary file 1 [file 1 › ijmf_a_1674803_sm8600.pdf]

## ***User Manual to access the ECV Prediction Score Calculator.***

Step 1:

Download the file from the website and save it in a folder ECV

Step 2:

Open the Excel File from the saved folder ECV

- If the excel is in protected view, click on Enable Editing and Enable content.

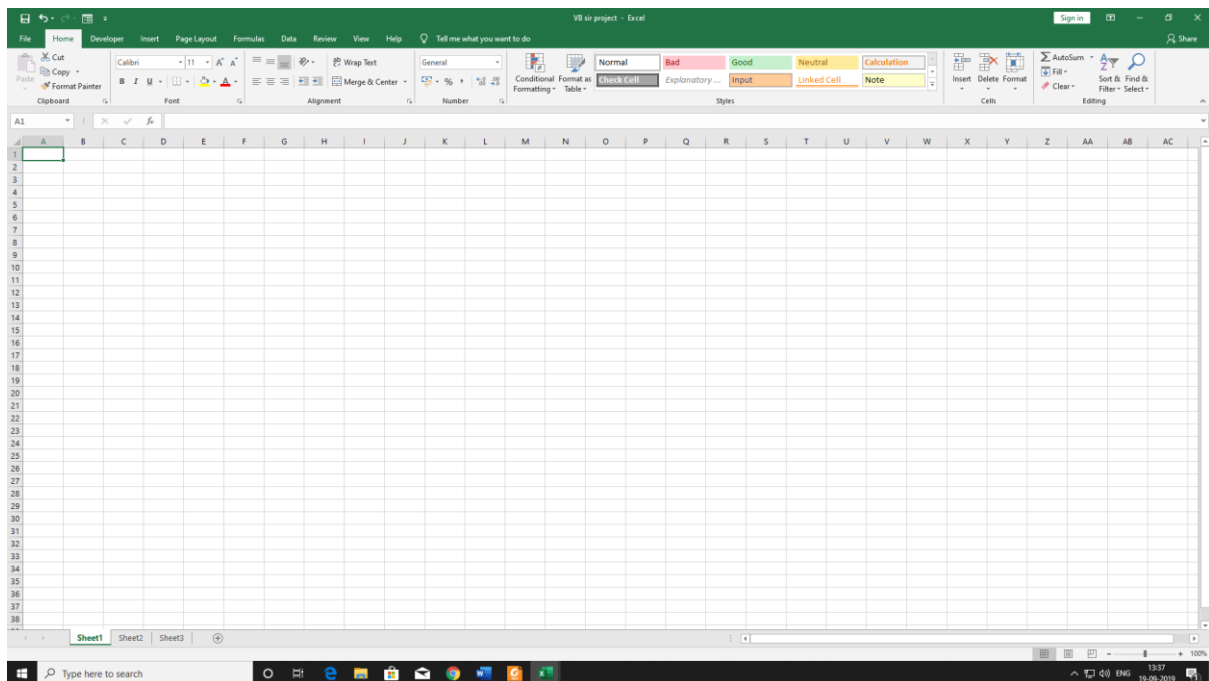

Step 3: Click on the developer tab

NOTE:

- If the developer tab is not available in your excel file follow the steps given at the end of the user manual.

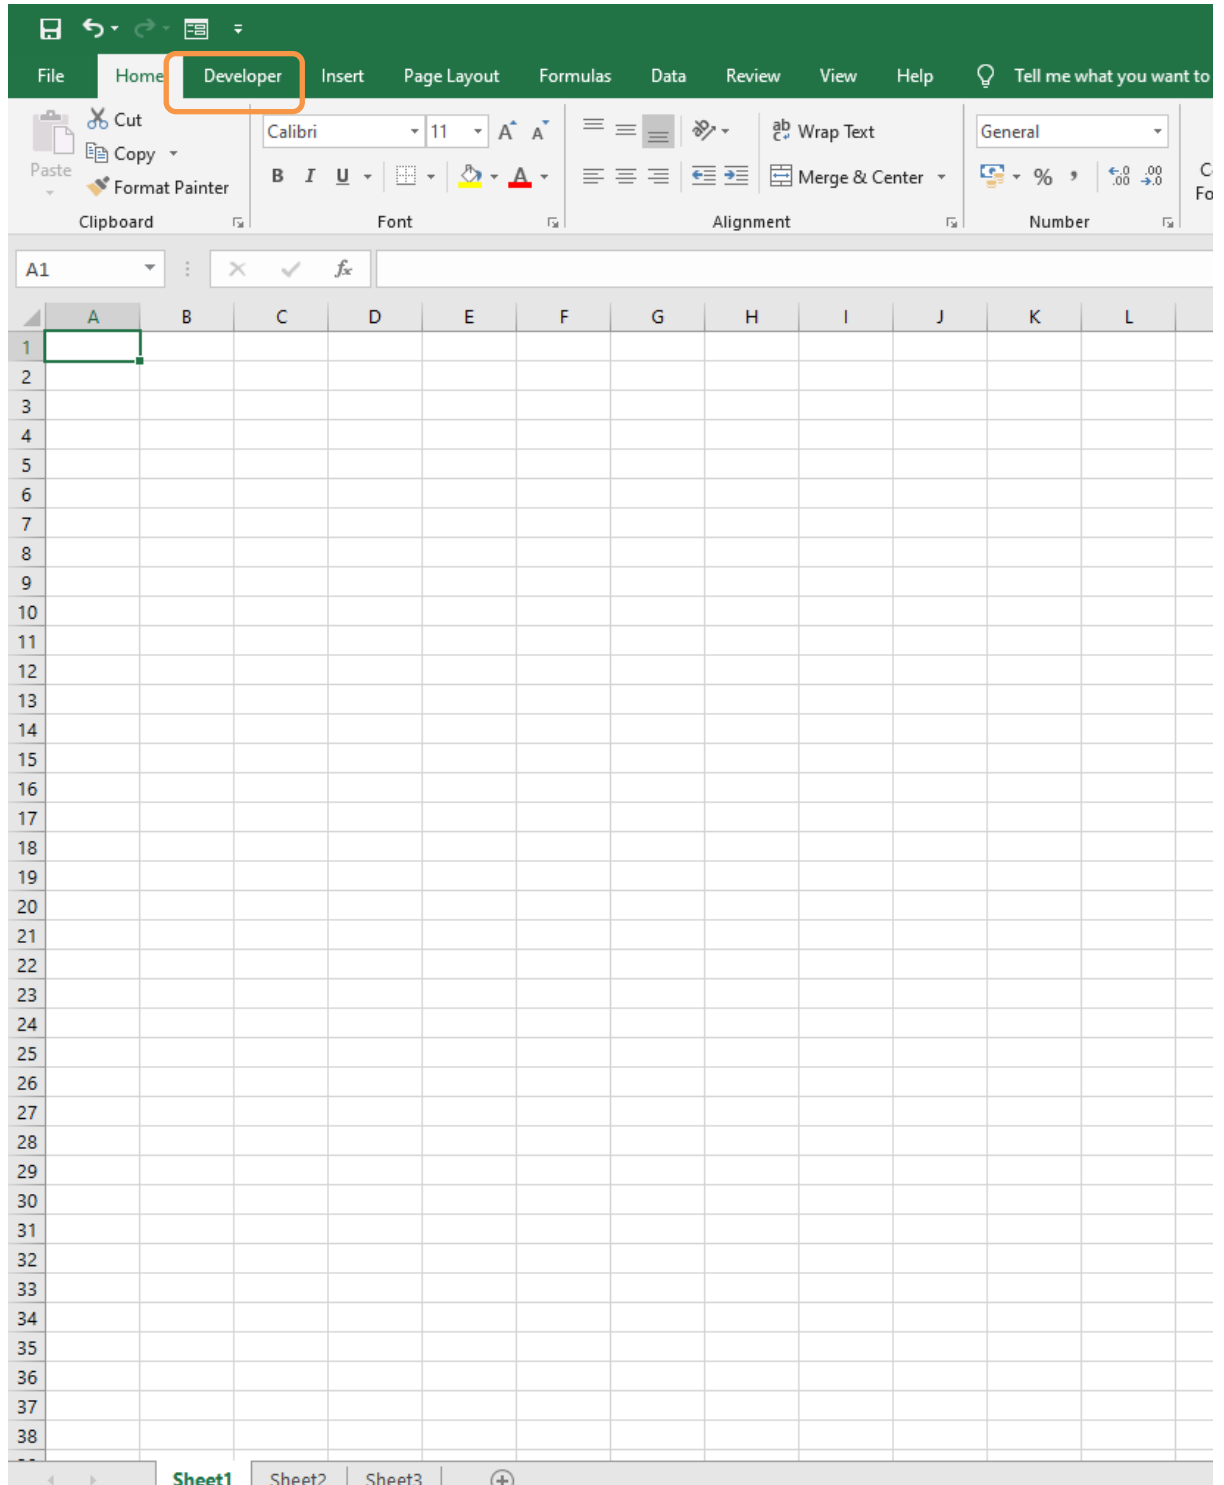

Step 4: Visual Basic icon from the menu.

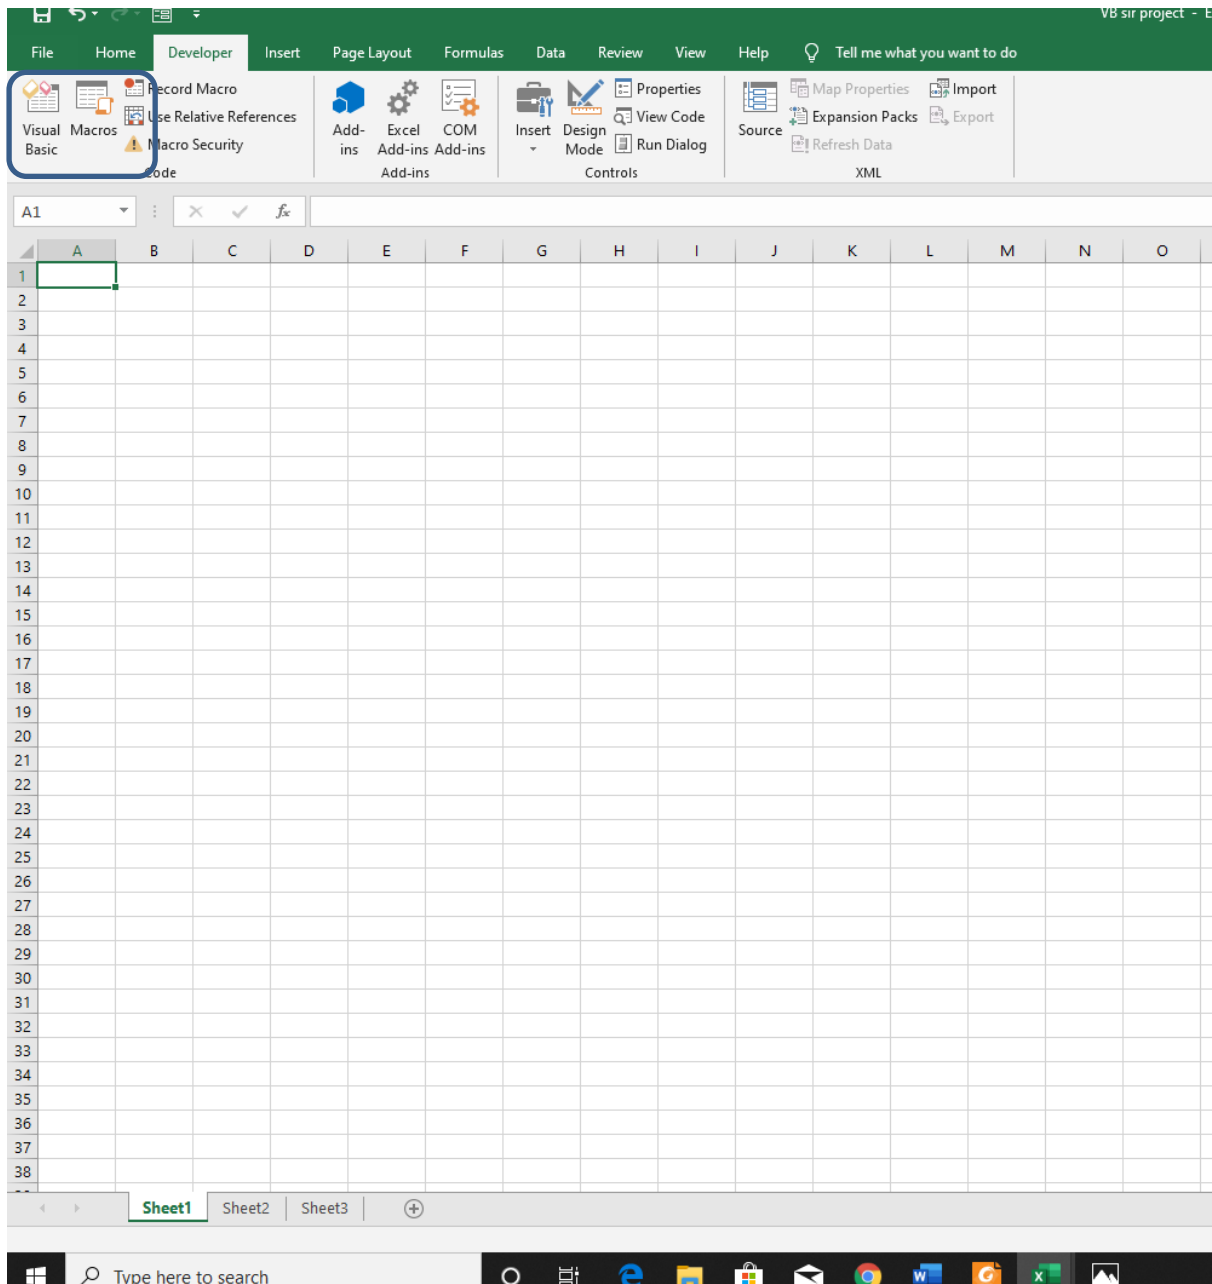

## Step 5:

- The VBA editor opens.
- Close the sheet1 code page.

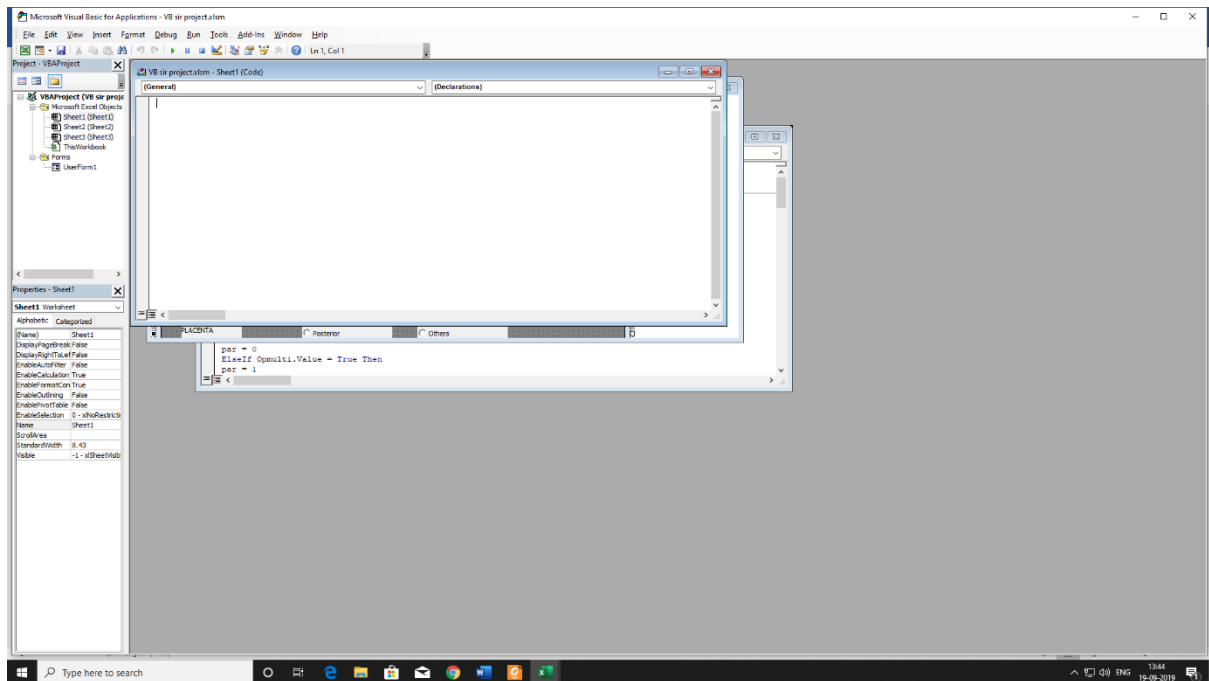

- Once the sheet1 code page is closed VB editor page of ECV score will be seen as before.

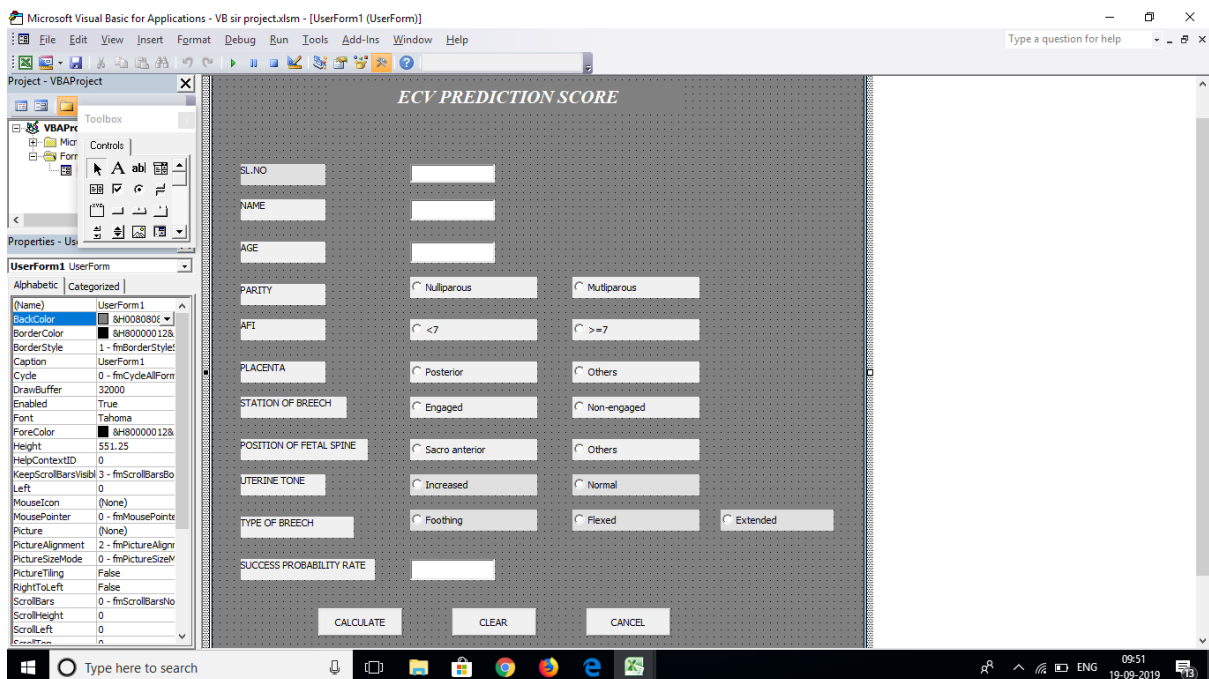

Click on the run/play icon to run the ECV Prediction Score user-form

Click on the run/play icon to run the ECV Prediction Score user-form

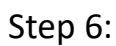

The data entered will be stored in the excel file and can be retrieved later if needed for any further analysis.

The data entered will be stored in the excel file and can be retrieved later if needed for any further analysis.

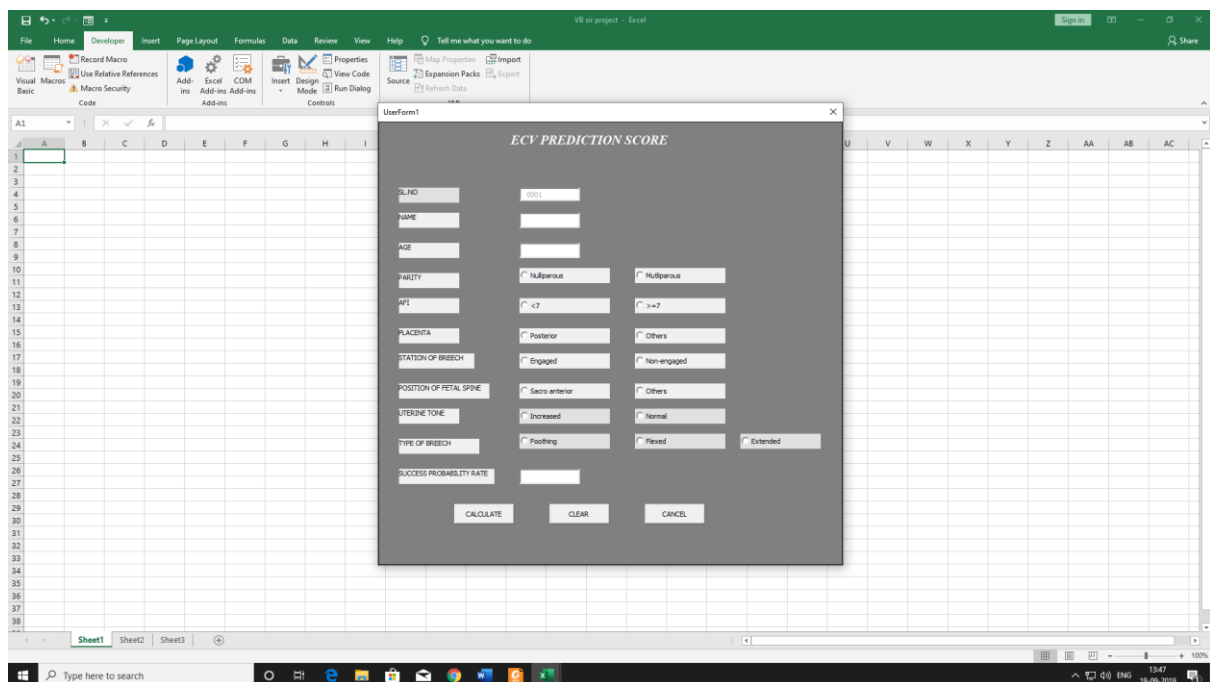

Step 8: Click on the Clear button to enter the next patient's data

The screenshot shows an Excel spreadsheet with a 'UseForm1' dialog box open. The dialog box is titled 'ECV PREDICTION SCORE' and contains the following fields and options:

- BLIND:
- NAME:
- AGE:
- PARITY: ☒ Multiparous ☐ Nulliparous
- AP1: ☐ <7 ☒ >=7
- PLACENTA: ☒ Posterior ☐ Others
- STATION OF BREECH: ☐ Engaged ☒ Non-engaged
- POSITION OF FETAL SPINE: ☒ Sacro anterior ☐ Others
- UTERINE TONE: ☐ Increased ☒ Normal
- TYPE OF BREECH: ☐ Footling ☒ Flexed ☐ Extended
- SUCCESS PROBABILITY RATE:

At the bottom of the dialog box, there are three buttons: 'CALCULATE', 'CLEAR', and 'CANCEL'. The 'CLEAR' button is highlighted.

Step 9: While closing ensure to save the excel file so that the entered data will be stored.

**STEPS TO ENABLE DEVELOPER TAB:(Freely accessible YouTube videos are available)**

**Press Alt+F11 shortcut key to open the VBA editor.**

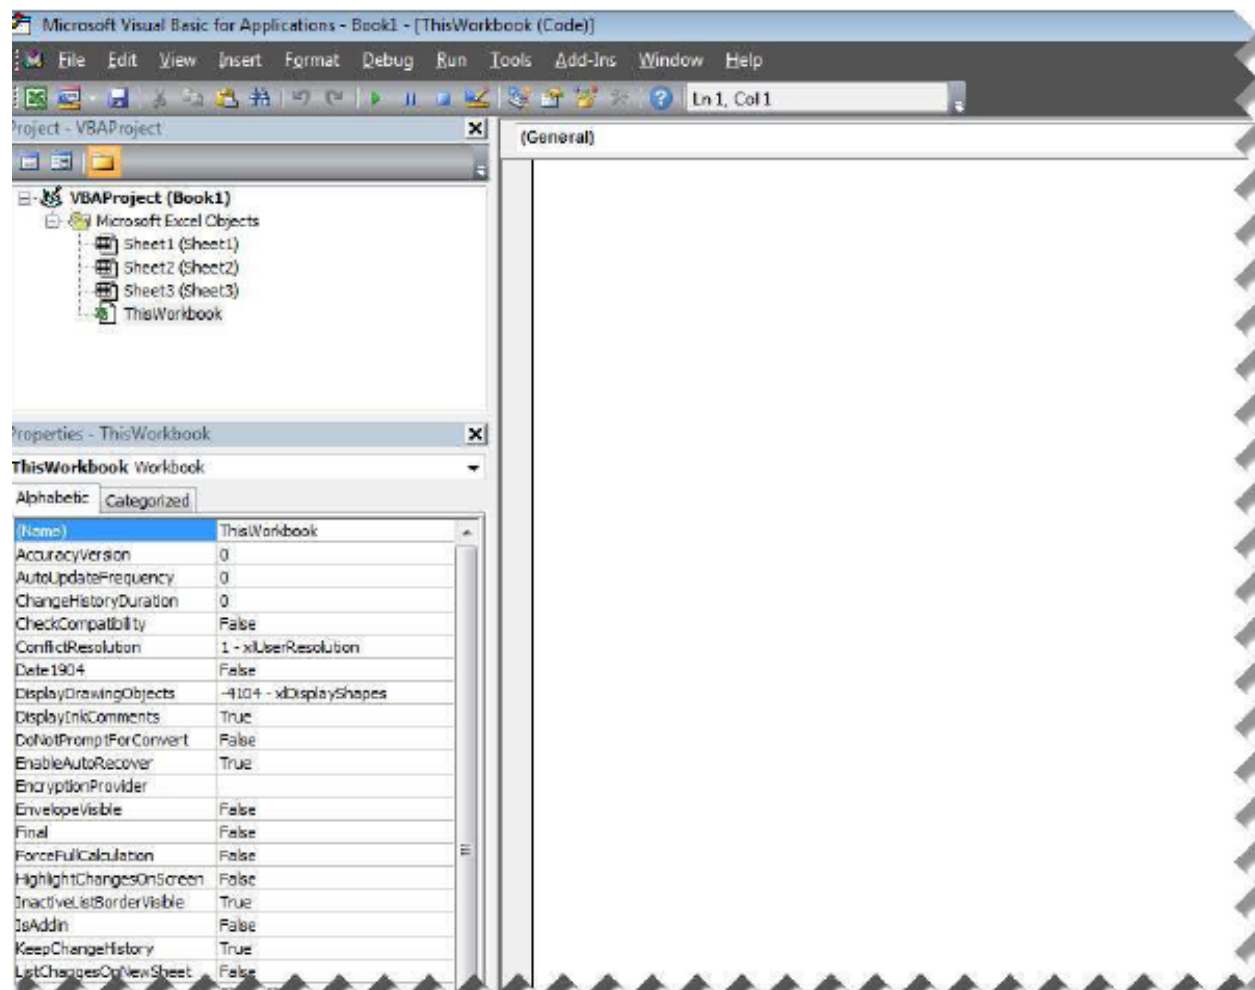

**Step 1.** To enable 'Developer' menu in Excel 20XX. To do the same, click on File >>Options.

**Step 2.** Click Customize Ribbon Tab and check 'Developer' and click 'OK'.

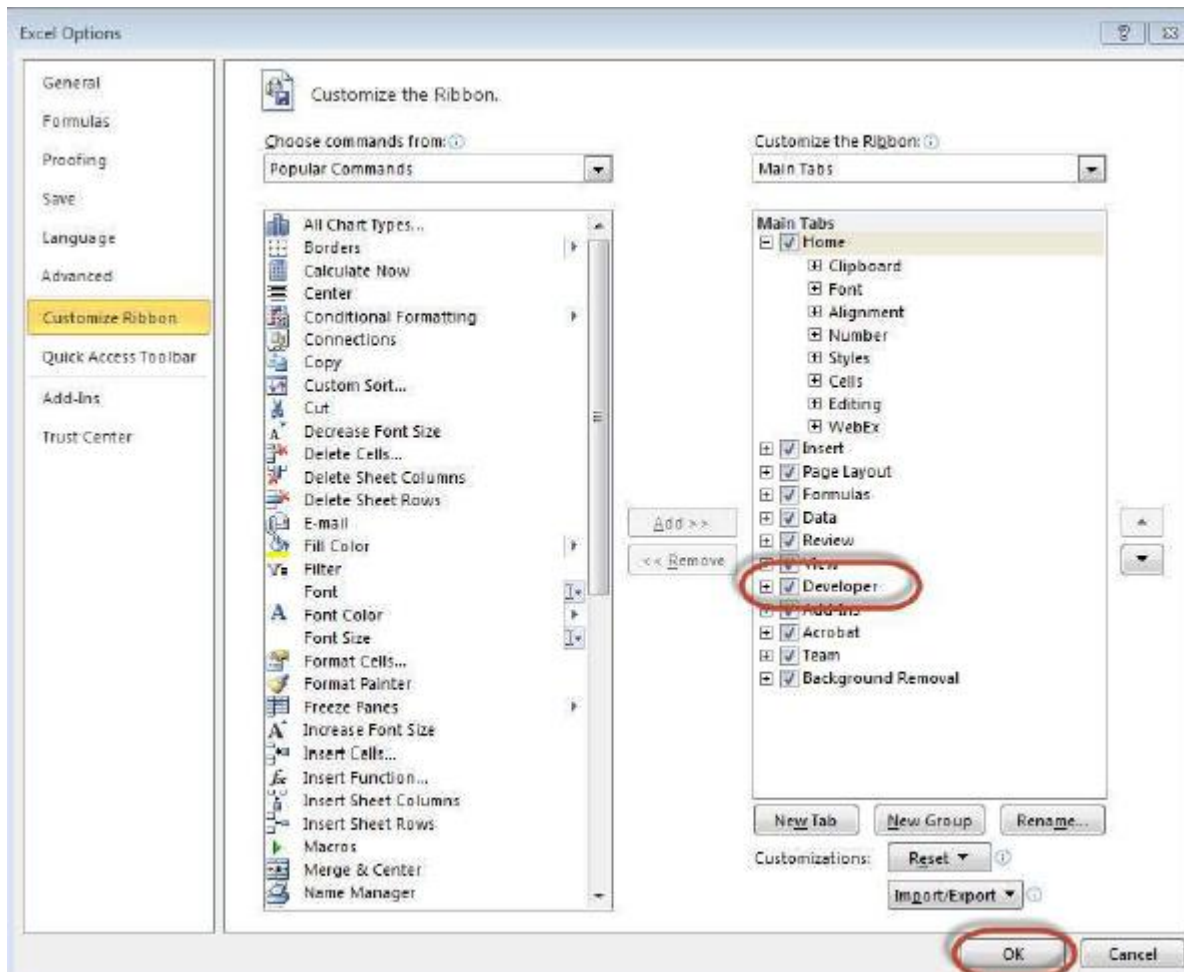

**Step 3.** The 'Developer' ribbon appears in menu bar.

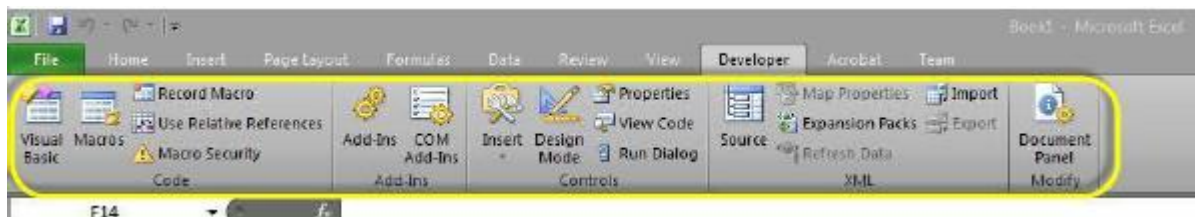

**Two ways to access Visual Basic user Forms:**

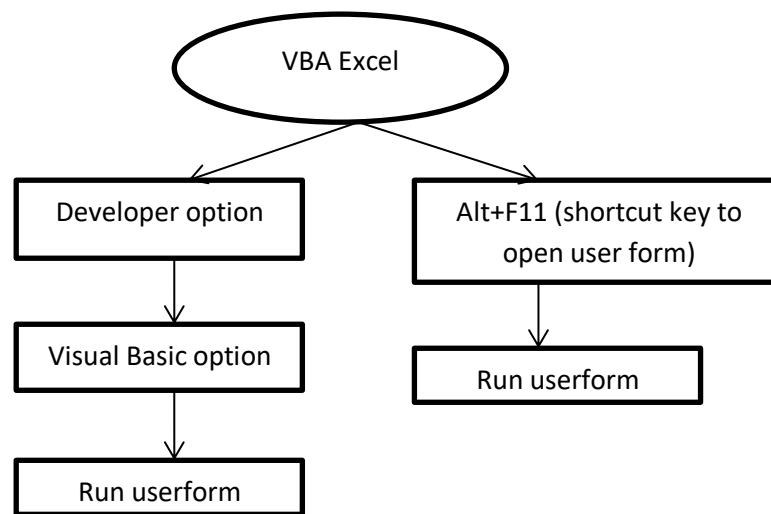

**Note:**

Kindly do not make any changes in the coding of the project. Make use of the calculator by skipping the design and code.
